# Supplementary material for: Hierarchically structured biphenylene-bridged periodic mesoporous organosilica
Source: Royal Society of Chemistry journal article supplement (doi:10.1039/c1jm12023a), 2011-01-01
Supplement: c1jm12023a.pdf [file c1jm12023a.pdf]

## SUPPORTING INFORMATION

# Hierarchically Structured Biphenylene-Bridged Periodic Mesoporous Organosilica

Yan Li<sup>a</sup>, Andreas Keilbach<sup>a</sup>, Marcel Kienle<sup>a</sup>, Yasutomo Goto<sup>b,c</sup>, Shinji Inagaki<sup>b,c</sup>, Paul Knochel<sup>a</sup>,  
and Thomas Bein<sup>a,\*</sup>

<sup>a</sup> Department of Chemistry and Center for NanoScience (CeNS), University of Munich (LMU),  
Butenandtstrasse 5–13 (E), Munich 81377, Germany.

<sup>b</sup> Toyota Central R&D Laboratories Inc., Nagakute, Aichi 480-1192, Japan.

<sup>c</sup> Core Research for Evolutional Science and Technology (CREST), Japan Science and Technology  
Agency (JST), Kawasaki, Saitama 332-0012, Japan

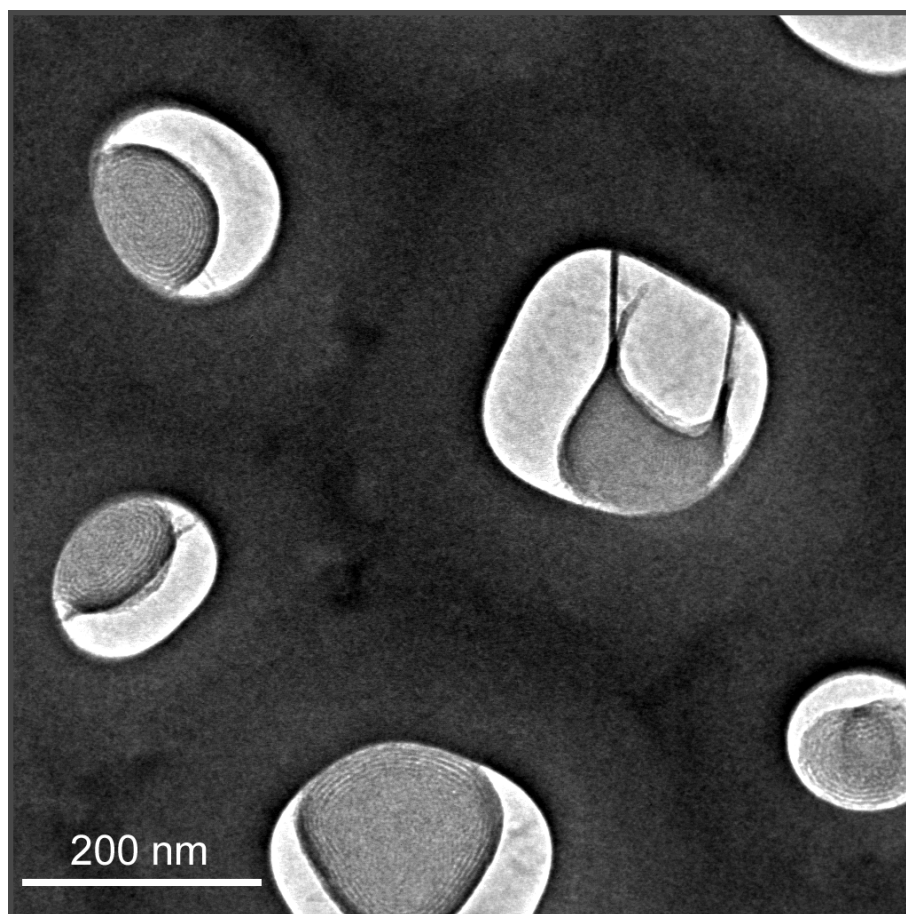

**Figure S1.** Plan-view TEM micrograph of the CTAB-columnar-lamellar Bp-PMO sample, demonstrating the significant shrinkage of the structure due to the existence of a lamellar phase.

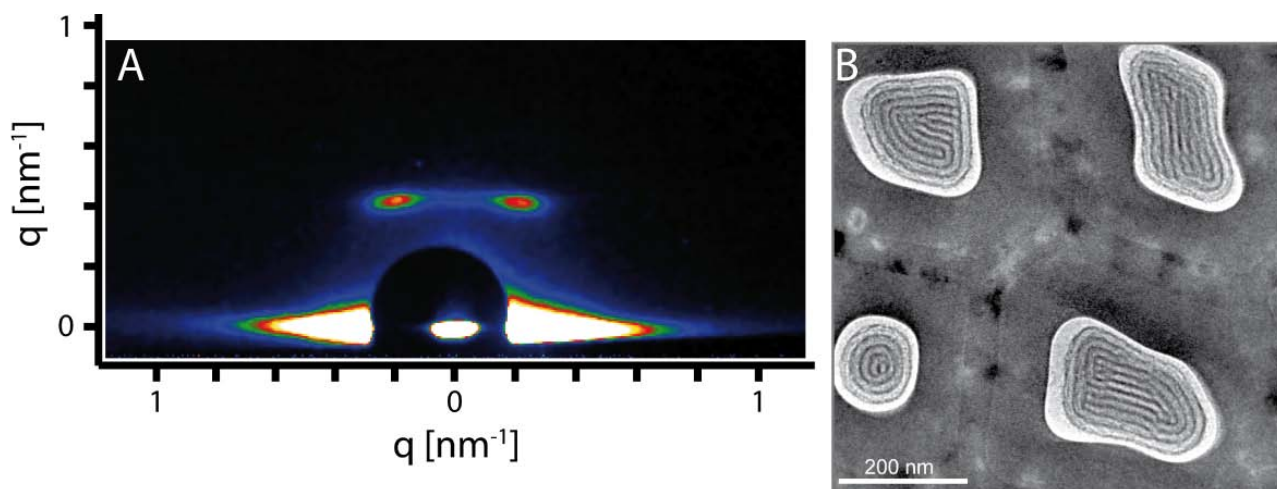

**Figure S2.** A) 2D-SAXS pattern of an as-prepared F127-circular Bp-PMO sample and B) plan-view TEM micrograph showing the preservation of highly-ordered circular structure and minor shrinkage of the structure of a calcined sample F127-circular-250 Bp-PMO.

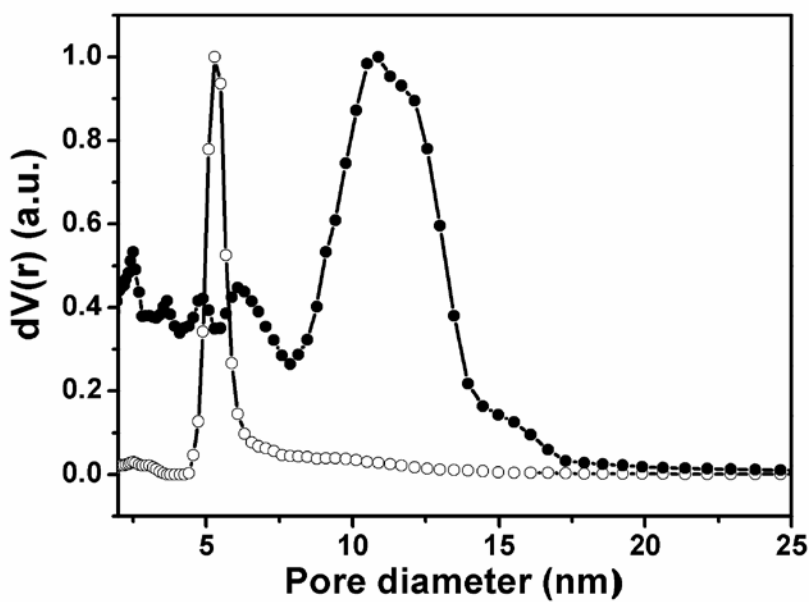

**Figure S3.** DFT pore-size distribution from the adsorption branch (●) and the desorption branch (○) of the sample F127-circular-250 Bp-PMO

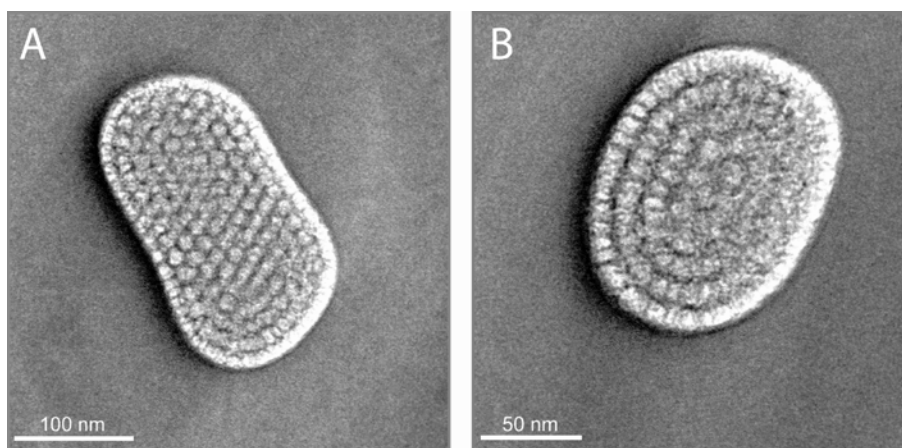

**Figure S4.** TEM micrographs of a F127-cubic-200 Bp-PMO. A) Plan-view along the [111] direction and B) Plan-view along the [110] direction.

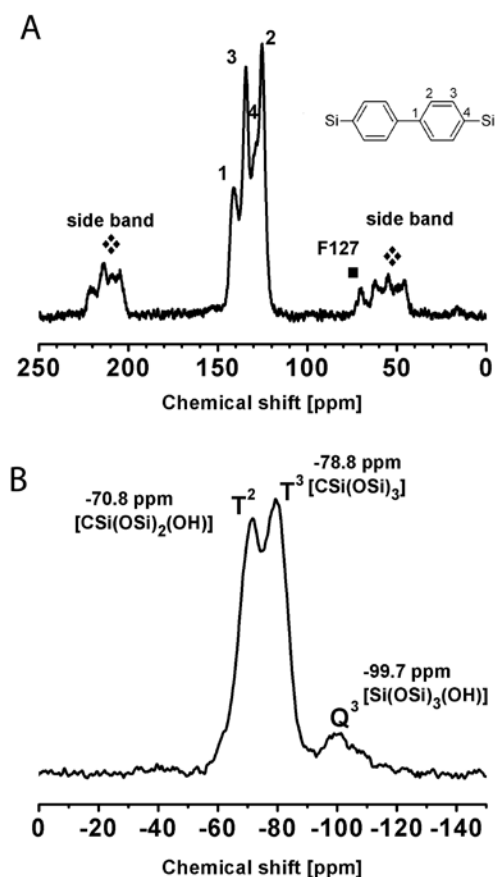

**Figure S5.** A) <sup>13</sup>C-MAS NMR and B) <sup>29</sup>Si NMR spectra of the calcined F127-cubic-250 Bp-PMO.
